# Supplementary material for: A deep learning approach for complex microstructure inference
Source: PubMed Central journal article supplement (PMC8560760; doi:10.1038/s41467-021-26565-5), 2021-11-01
Supplement: 41467_2021_26565_MOESM1_ESM.pdf [file 41467_2021_26565_MOESM1_ESM.pdf]

# Supplementary Information for "A Deep Learning Approach for Complex Microstructure Inference"

by  
Ali Riza Durmaz<sup>1,2,3,\*,+</sup>, Martin Müller<sup>4,5,+</sup>, Bo Lei<sup>6</sup>, Akhil Thomas<sup>1,3</sup>, Dominik Britz<sup>4,5</sup>, Elizabeth A. Holm<sup>6</sup>, Chris Eberl<sup>1,3</sup>, Frank Mücklich<sup>4,5</sup>, and Peter Gumbsch<sup>1,2</sup>

- 1: Fraunhofer Institute for Mechanics of Materials IWM, Freiburg, 79108, Germany
- 2: Karlsruhe Institute of Technology (KIT), Institute for Applied Materials IAM, Karlsruhe, 76131, Germany
- 3: University of Freiburg, Freiburg, 79110, Germany
- 4: Saarland University, Department of Materials Science, Saarbrücken, 66123, Germany
- 5: Material Engineering Center Saarland, Saarbrücken, 66123, Germany
- 6: Carnegie Mellon University, Department of Materials Science and Engineering, Pittsburgh, PA 15213, USA

\*: [ali.riza.durmaz@iwm.fraunhofer.de](mailto:ali.riza.durmaz@iwm.fraunhofer.de)

+: these authors contributed equally to this work

**Supplementary Table 1: Number of images and their lath-shaped bainite content for each fold of each of the four data sets.**

| Dataset        | Fold                         | 0    | 1    | 2    | 3    | 4    |
|----------------|------------------------------|------|------|------|------|------|
| LOM            | Number of tile images        | 151  | 151  | 151  | 151  | 150  |
|                | Bainite pixel percentage [%] | 27   | 26.3 | 27.4 | 31.2 | 29.8 |
| LOM downscaled | Number of tile images        | 36   | 36   | 36   | 36   | 35   |
|                | Bainite pixel percentage [%] | 30.6 | 26.7 | 25.2 | 28   | 25.4 |
| SEM            | Number of tile images        | 83   | 83   | 83   | 82   | 82   |
|                | Bainite pixel percentage [%] | 50.9 | 58.6 | 62.3 | 63.2 | 60.2 |
| SEM downscaled | Number of tile images        | 27   | 27   | 27   | 27   | 27   |
|                | Bainite pixel percentage [%] | 50.9 | 46.8 | 55.3 | 55.1 | 59.5 |

**Supplementary Table 2:** Number of images and their lath-shaped bainite content for each fold of each of the data sets from tile experiment.

| Tile size | Fold                         | 0    | 1    | 2    | 3    | 4    |
|-----------|------------------------------|------|------|------|------|------|
| 64        | Number of tile images        | 2612 | 2611 | 2611 | 2611 | 2611 |
|           | Bainite pixel percentage [%] | 27.2 | 27.7 | 27.1 | 27.8 | 27.5 |
| 96        | Number of tile images        | 1020 | 1020 | 1020 | 1020 | 1020 |
|           | Bainite pixel percentage [%] | 27.0 | 29.7 | 27.7 | 29.3 | 28.1 |
| 128       | Number of tile images        | 653  | 653  | 653  | 653  | 652  |
|           | Bainite pixel percentage [%] | 27.3 | 27.2 | 27.2 | 28.7 | 26.9 |
| 192       | Number of tile images        | 255  | 255  | 255  | 255  | 255  |
|           | Bainite pixel percentage [%] | 28.4 | 28.5 | 29.0 | 27.3 | 28.7 |
| 256       | Number of tile images        | 164  | 163  | 163  | 163  | 163  |
|           | Bainite pixel percentage [%] | 25.8 | 28.4 | 27.1 | 28.5 | 27.4 |
| 512       | Number of tile images        | 41   | 41   | 41   | 41   | 40   |
|           | Bainite pixel percentage [%] | 27.6 | 29.0 | 27.4 | 29.1 | 24.1 |

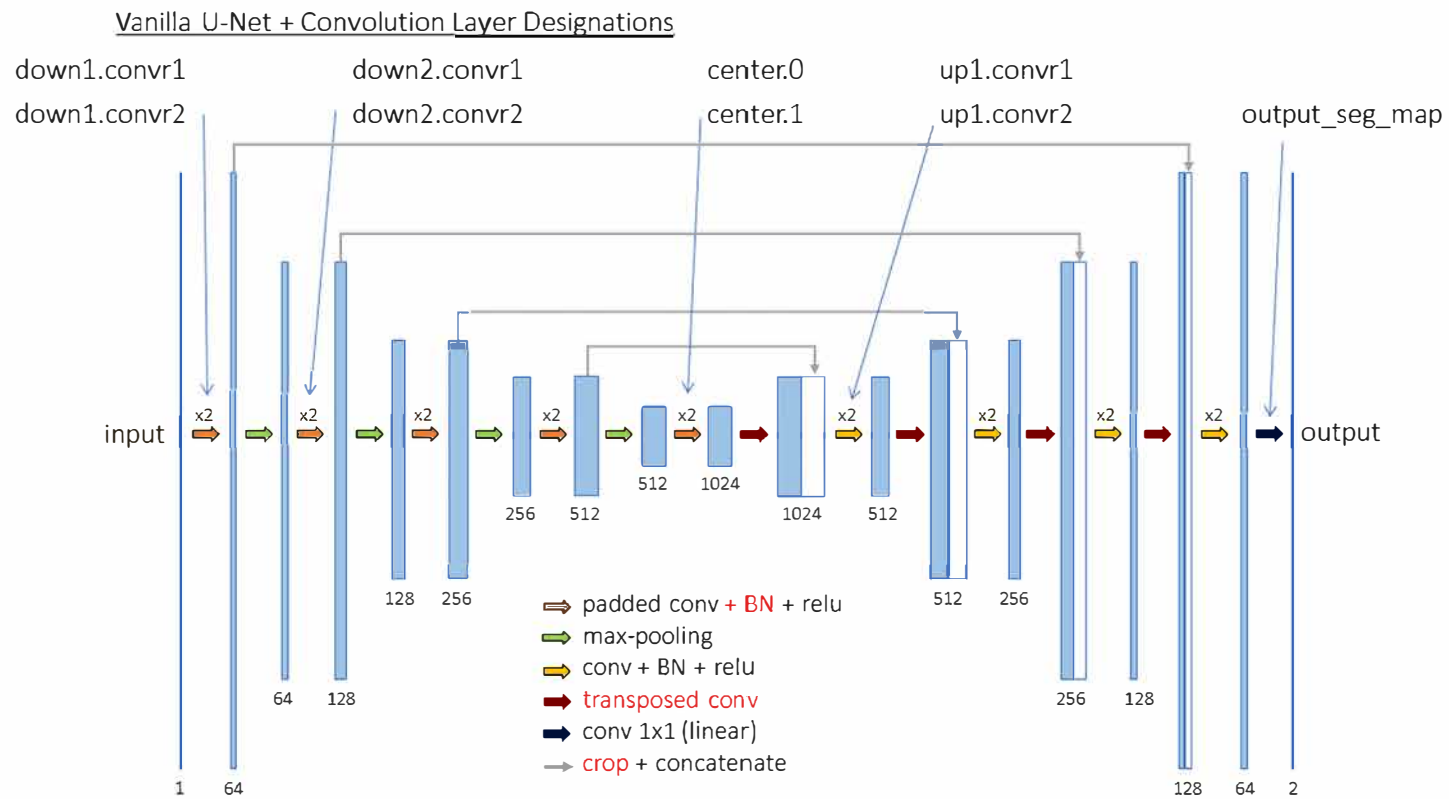

Supplementary Figure 1: Vanilla U-Net architecture.

### U-Net VGG16

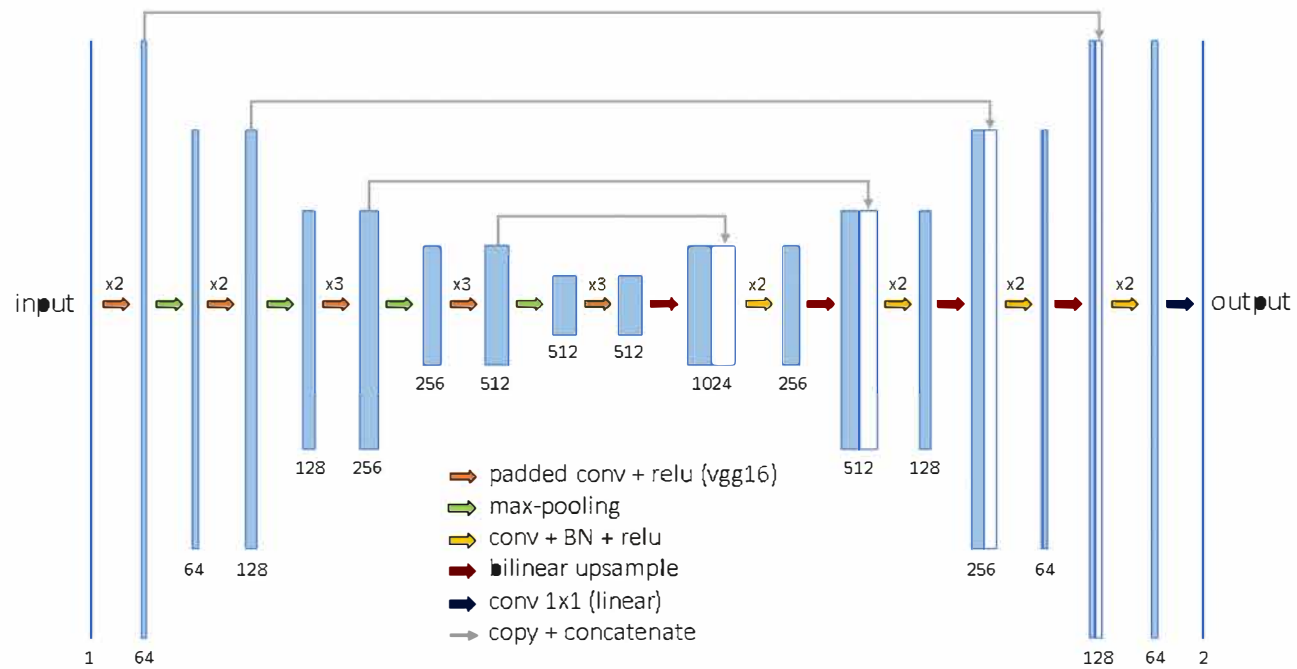

Supplementary Figure 2: VGG16 U-Net architecture.

Supplementary Table 3: Description of individual augmentations applied for vanilla U-Net models on LOM images.

| Augmentation type      | Description: aug. type / parameter(s)                    | $x_{lim}$            | p    |
|------------------------|----------------------------------------------------------|----------------------|------|
| Affine transformation  | Linear transformation / rotate, shift and scale limit    | 30, 0.1, 0.1         | 0.8  |
| Rotation $90^\circ$    | - / -                                                    | -                    | 0.25 |
| Reflection             | - / -                                                    | -                    | 0.25 |
| Elastic transformation | Local deformations / alpha affine, alpha, sigma, approx. | 0, 15.86, 5.15, True | 0.35 |
| Optical distortion     | Barrel or pincushion / distort limit, shift limit        | 0.07, 0.23           | 0.25 |

Table 2: Description of individual augmentations applied for vanilla U-Net models on SEM images

| Augmentation type      | Description: aug. type / parameter(s)                    | $x_{lim}$            | p    |
|------------------------|----------------------------------------------------------|----------------------|------|
| Affine transformation  | Linear transformation / rotate, shift and scale limit    | 30, 0.1, 0.1         | 0.8  |
| Rotation $90^\circ$    | - / -                                                    | -                    | 0.25 |
| Reflection             | - / -                                                    | -                    | 0.25 |
| Elastic transformation | Local deformations / alpha affine, alpha, sigma, approx. | 0, 40.52, 7.77, True | 0.35 |
| Optical distortion     | Barrel or pincushion / distort limit, shift limit        | 0.14, 0.42           | 0.25 |
| Gaussian blurring      | Convolution Gaussian kernel / blur kernel size           | 9                    | 0.2  |
| Motion blurring        | Convolution motion-blur kernel / blur kernel size        | 7                    | 0.2  |

Supplementary Table 4: Description of augmentations applied for UNet-Vgg16 models.

| Augmentation type      | Description: aug. type / parameter(s)                    | $x_{lim}$      | p   |
|------------------------|----------------------------------------------------------|----------------|-----|
| Affine transformation  | Linear transformation / rotate, shift and scale limit    | 45, 0, 0.2     | 0.7 |
| Reflection             | - / -                                                    | -              | 0.5 |
| Elastic transformation | Local deformations / alpha affine, alpha, sigma, approx. | 0, 40, 6, True | 0.5 |
| Grid Distortion        | Local deformations / num steps, distort limit            | 5, 0.2         | 0.5 |
| Gaussian blurring      | Convolution Gaussian kernel / blur kernel size           | 7              | 0.2 |
| Motion blurring        | Convolution motion-blur kernel / blur kernel size        | 5              | 0.2 |
| Gaussian noise         | - / var limit                                            | (10,50)        | 0.2 |
| Contrast               | - / limit                                                | 0.15           | 0.7 |
| Brightness             | - / limit                                                | 0.1            | 0.7 |

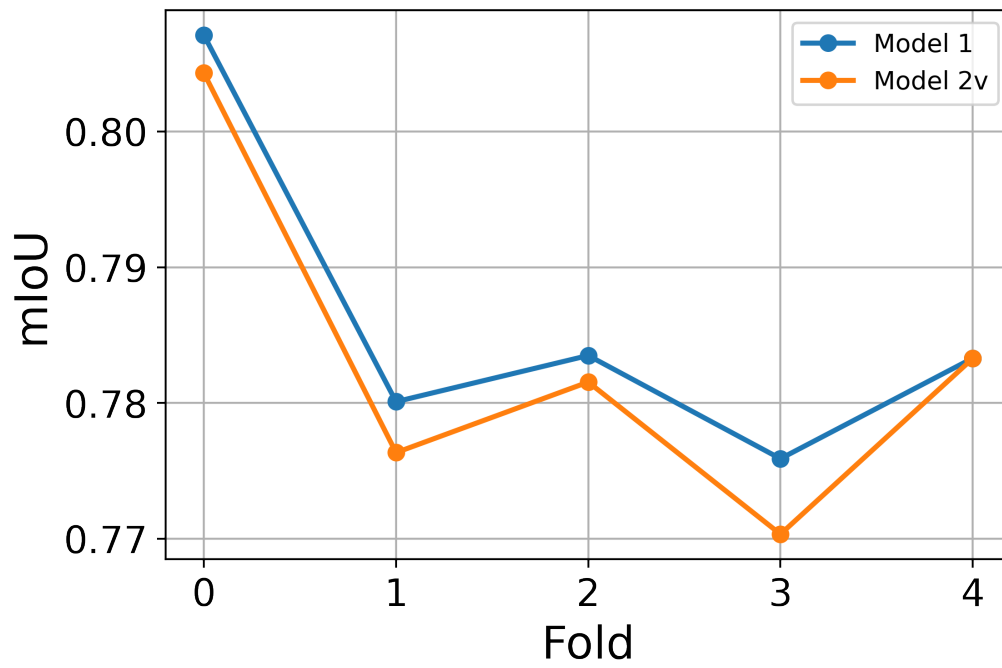

Supplementary Table 3: Class-averaged IoU for the different folds  $f$  for two exemplary models.



**Supplementary Table 5:** Description of individual training-validation as well as testing times for both architectures in the best configurations.

| Dataset | Vanilla U-Net           |                           | VGG16 U-Net             |                           |
|---------|-------------------------|---------------------------|-------------------------|---------------------------|
|         | Train + validation      | Test on full scale images | Train + validation      | Test on full scale images |
| LOM     | 256 × 256, 8 ms/image   | 1024 × 1024, 92 ms/image  | 256 × 256, 47 ms/image  | 1024 × 1024, 240 ms/image |
| SEM     | 512 × 512, 134 ms/image | 1024 × 717, 74 ms/image   | 512 × 512, 200 ms/image | 1024 × 717, 160 ms/image  |

Supplementary Figure 4: Grad-CAM maps indicating image regions that dictated the decision of the Vanilla U-Net network with respect to the background class. The individual panel captions refer to the specific network layer for which the activation map is computed (see Supplemental Figure 1).

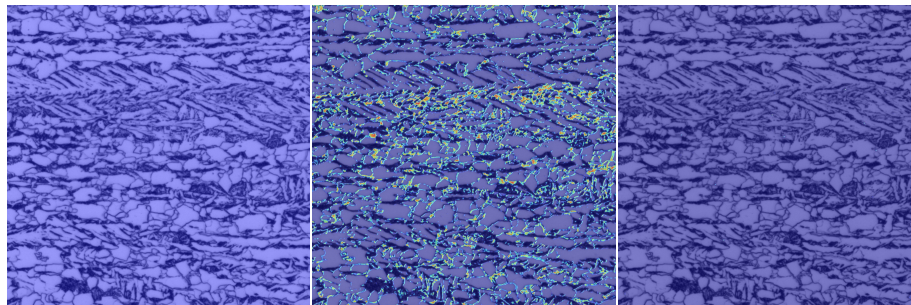

(4.1) down1.conv1

(4.2) down1.conv2

(4.3) down2.conv1

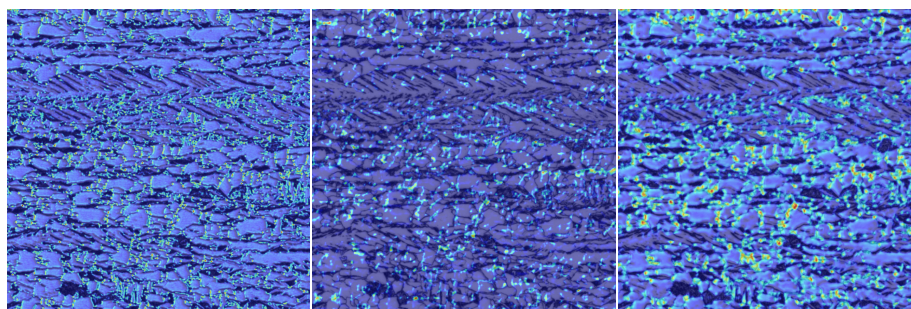

(4.4) down2.conv2

(4.5) down3.conv1

(4.6) down3.conv2

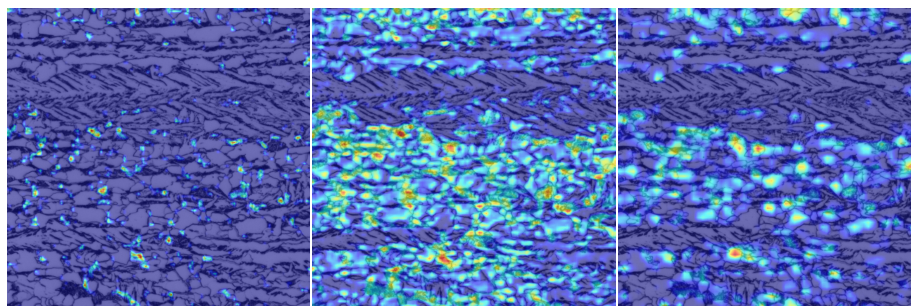

(4.7) down4.conv1

(4.8) down4.conv2

(4.9) center.0

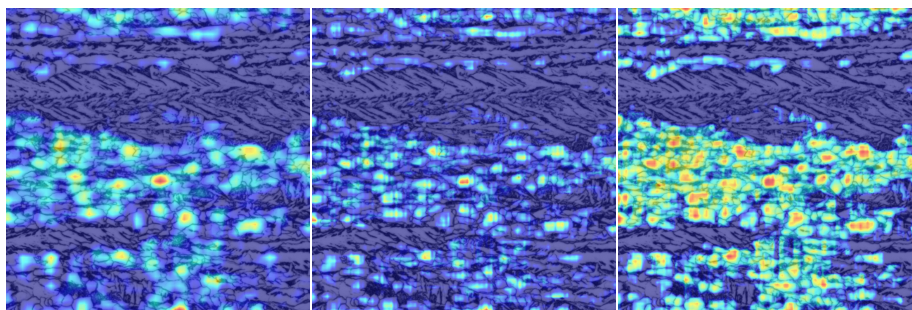

(4.10) center.1

(4.11) up1.conv1

(4.12) up1.conv2

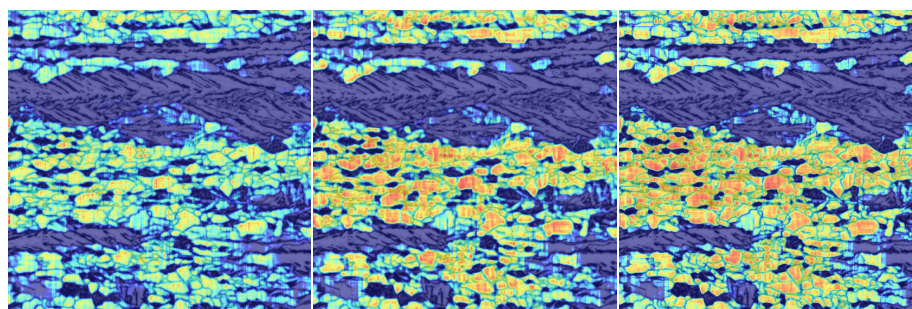

(4.13) up2.conv1

(4.14) up2.conv2

(4.15) up3.conv1

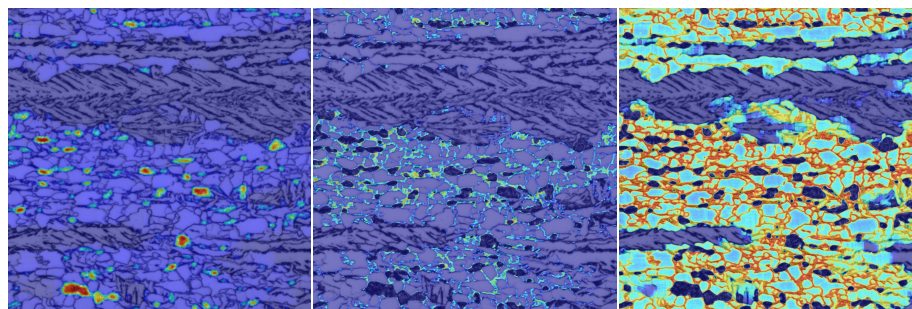

(4.16) up3.conv2

(4.17) up4.conv1

(4.18) up4.conv2

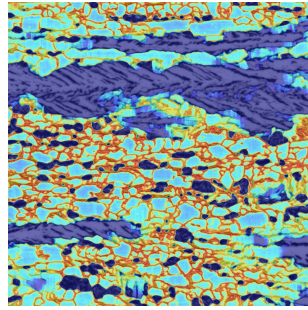

(4.19) output.seg.mask

Supplementary Figure 5: Grad-CAM maps indicating image regions that dictated the decision of the Vanilla U-Net network with respect to the foreground class. The individual panel captions refer to the specific network layer for which the activation map is computed (see Supplemental Figure 1).

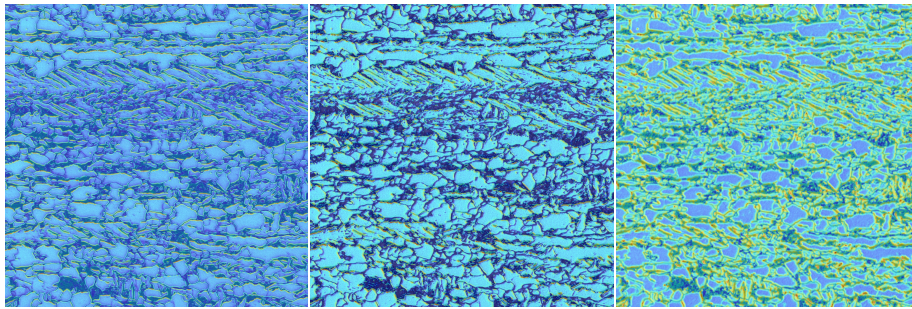

(5.1) down1.conv1

(5.2) down1.conv2

(5.3) down2.conv1

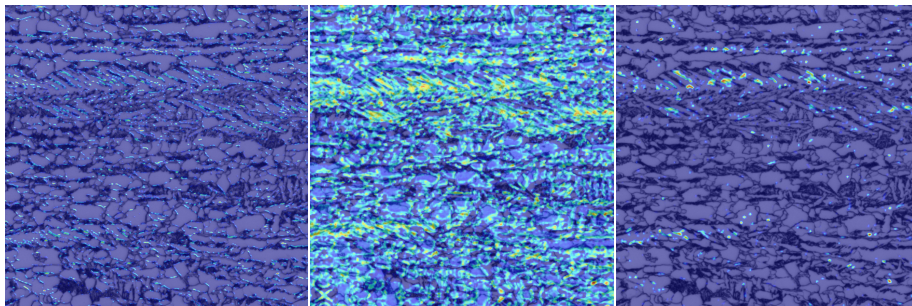

(5.4) down2.conv2

(5.5) down3.conv1

(5.6) down3.conv2

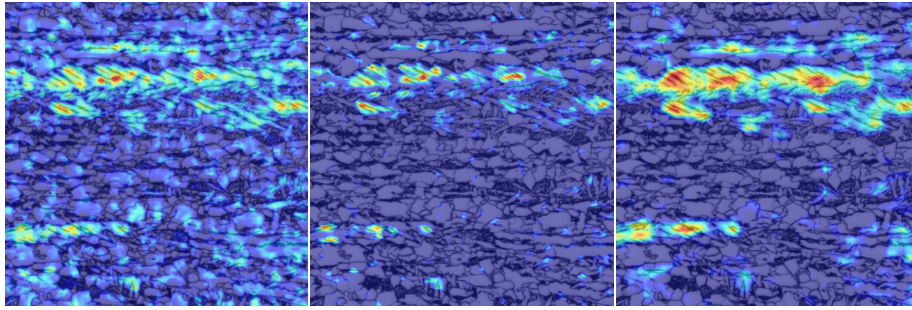

(5.7) down4.conv1

(5.8) down4.conv2

(5.9) center.0

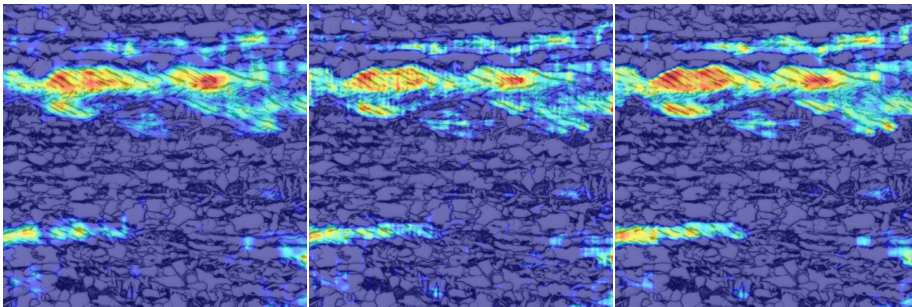

(5.10) center.1

(5.11) up1.conv1

(5.12) up1.conv2

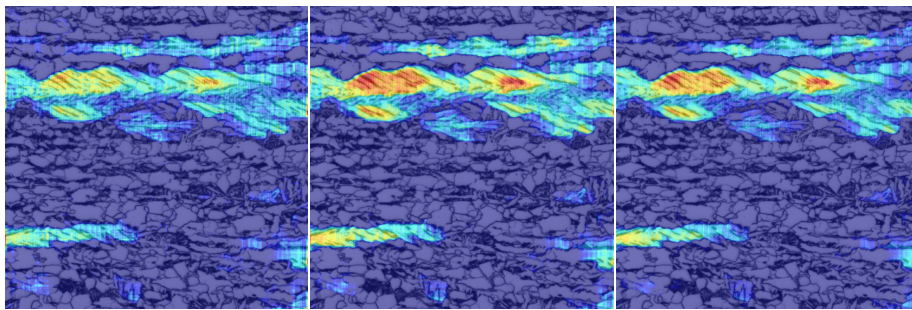

(5.13) up2.conv1

(5.14) up2.conv2

(5.15) up3.conv1

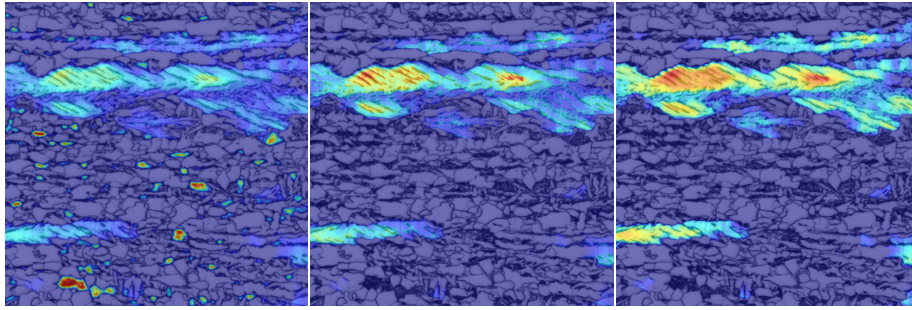

(5.16) up3.conv2

(5.17) up4.conv1

(5.18) up4.conv2

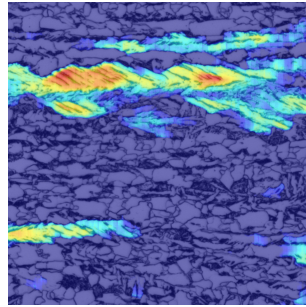

(5.19) output.seg.mask

Supplementary Figure 6: Grad-CAM maps indicating image regions that dictated the decision of the VGG U-Net network with respect to the background class. The individual panel captions refer to the specific network layer for which the activation map is computed (see Supplemental Figure 1 and 2).

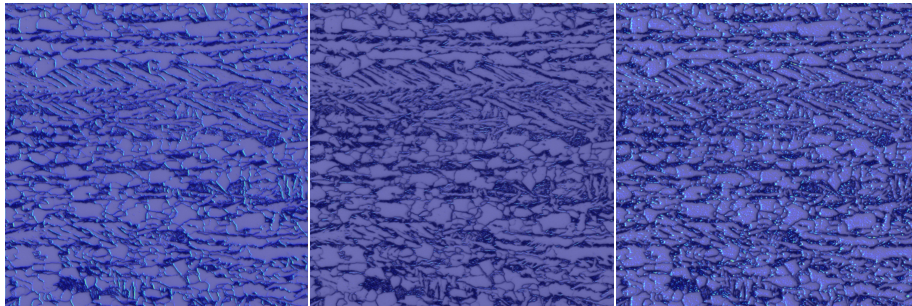

(6.1) down1.conv1

(6.2) down1.conv2

(6.3) down2.conv1

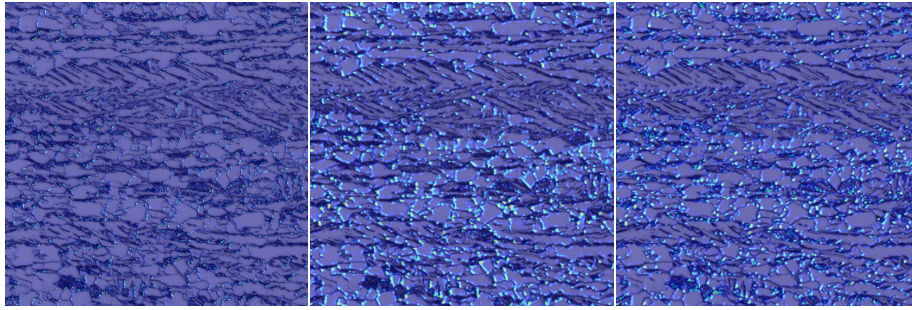

(6.4) down2.conv2

(6.5) down3.conv1

(6.6) down3.conv2

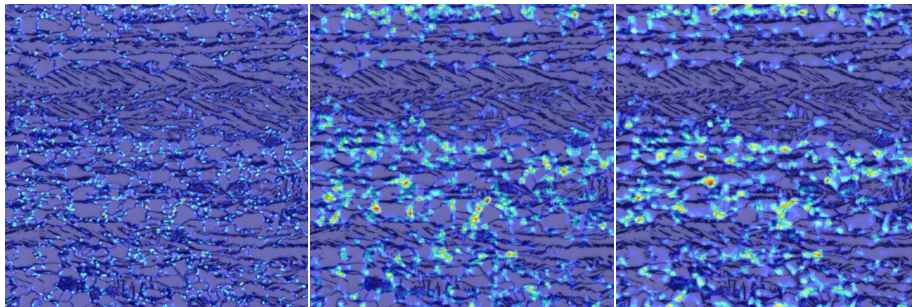

(6.7) down3.conv3

(6.8) down4.conv1

(6.9) down4.conv2

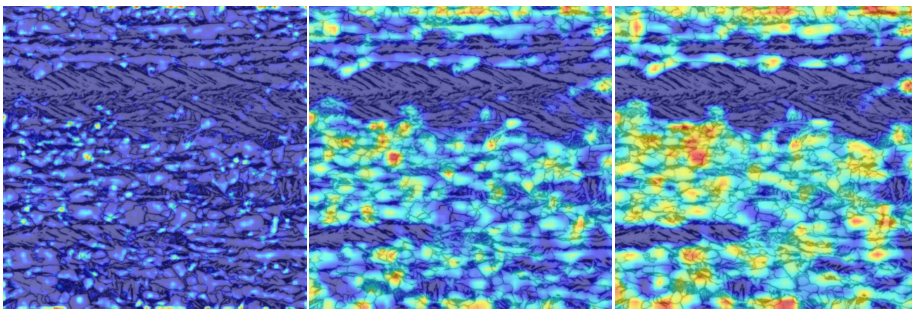

(6.10) down4.conv3

(6.11) center.0

(6.12) center.1

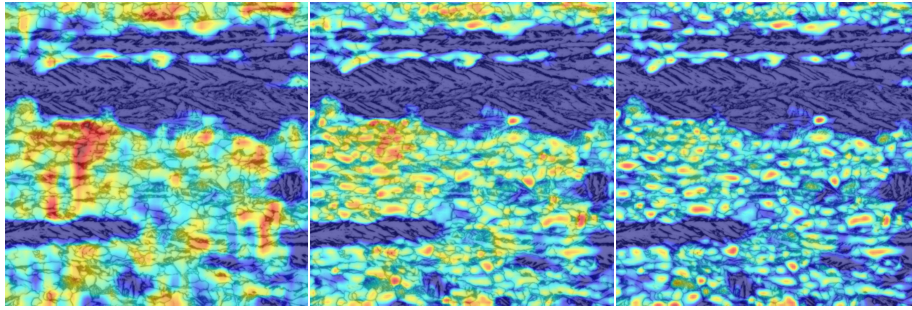

(6.13) center.2

(6.14) up1.conv1

(6.15) up1.conv2

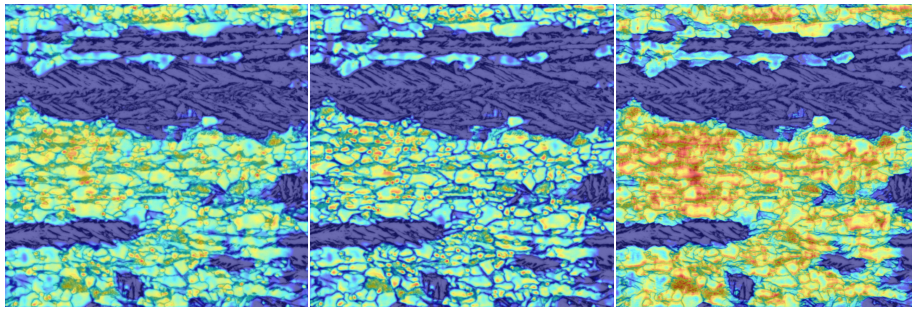

(6.16) up2.conv1

(6.17) up2.conv2

(6.18) up3.conv1

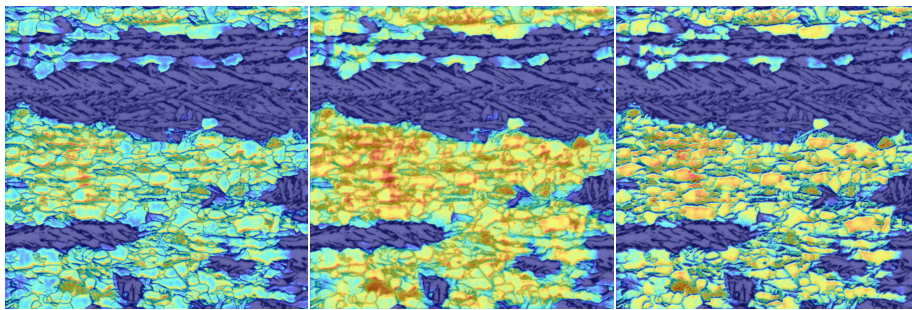

(6.19) up3.conv2

(6.20) up4.conv1

(6.21) up4.conv2



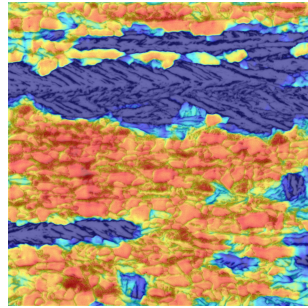

(6.22) output.seg.mask

Supplementary Figure 7: Grad-CAM maps indicating image regions that dictated the decision of the VGG U-Net network with respect to the foreground class. The individual panel captions refer to the specific network layer for which the activation map is computed (see Supplementary Figure 1 and 2).

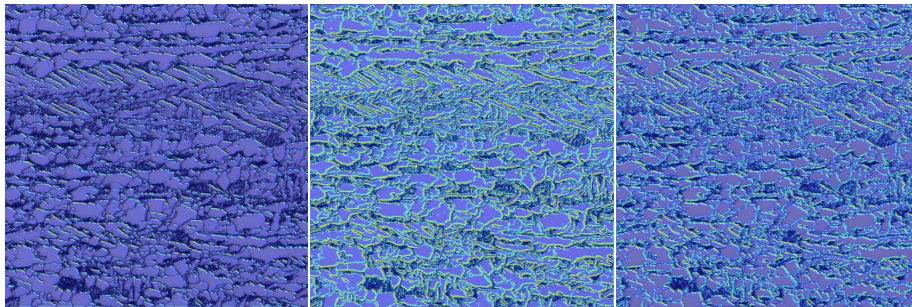

(7.1) down1.conv1

(7.2) down1.conv2

(7.3) down2.conv1

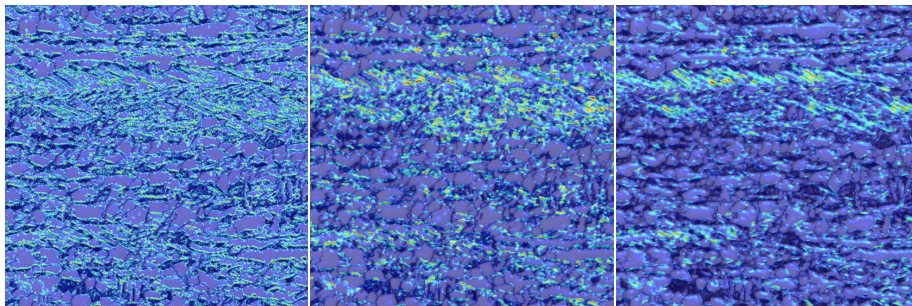

(7.4) down2.conv2

(7.5) down3.conv1

(7.6) down3.conv2

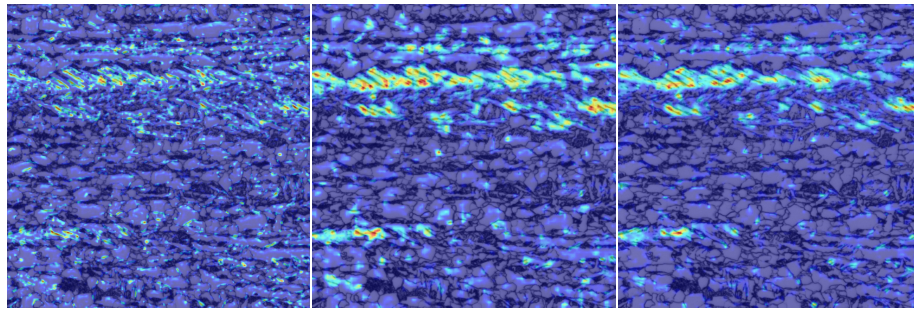

(7.7) down3.conv3

(7.8) down4.conv1

(7.9) down4.conv2

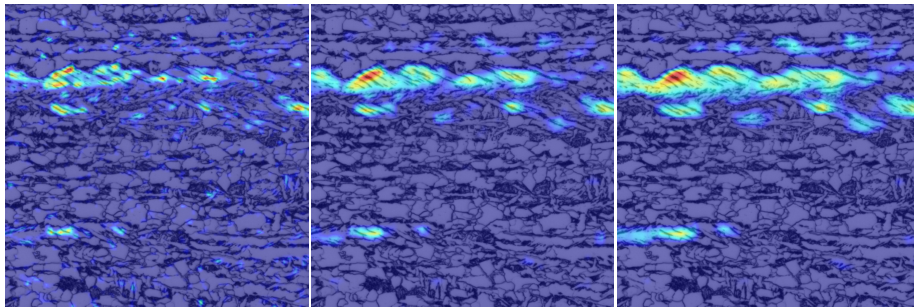

(7.10) down4.conv3

(7.11) center.0

(7.12) center.1

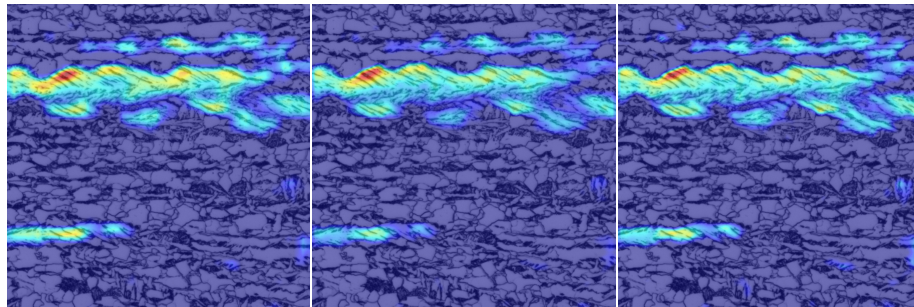

(7.13) center.2

(7.14) up1.conv1

(7.15) up1.conv2

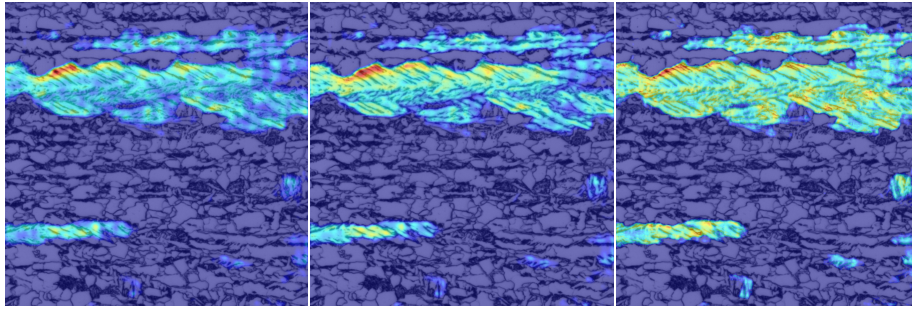

(7.16) up2.conv1

(7.17) up2.conv2

(7.18) up3.conv1

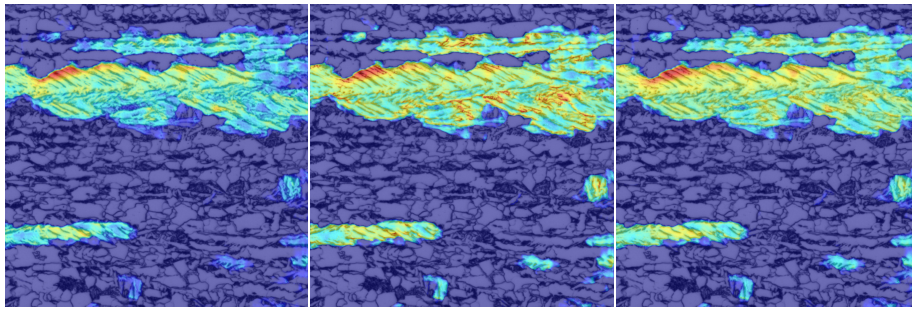

(7.19) up3.conv2

(7.20) up4.conv1

(7.21) up4.conv2

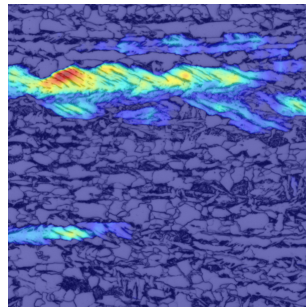

(7.22) output.seg.mask
